# Supplementary material for: Vaccine-Induced Protection Against Furunculosis Involves Pre-emptive Priming of Humoral Immunity in Arctic Charr
Source: Front Immunol. 2019 Feb 4;10:120. doi: 10.3389/fimmu.2019.00120 (PMC6369366; doi:10.3389/fimmu.2019.00120)
Supplement: Supplementary file 15 [file Data_Sheet_5.xlsx]

## Sheet: qPCR vs seq comparisons
Supplemental Data File 5. Expression values were obtained for RNA sequencing and qPCR for several treatment-time comparisons. These were then used to determine the correlation between methods. There was a significant positive correlation (r = 0.60, p = 0.024).
TRINITY_DN129687_c6_g1_i7			TRINITY_DN125593_c0_g4_i			TRINITY_DN128231_c6_g1_i1			TRINITY_DN129425_c4_g3_i7			TRINITY_DN123161_c0_g1_i3			TRINITY_DN129903_c0_g1_i7			TRINITY_DN124917_c1_g1_i18
B-cell linker protein			BOLA			C7			Fibronectin			Fibrinogen gamma chain			H2AB			MX2
Comparison	RNAseq	qPCR	Comparison	RNAseq	qPCR	Comparison	RNAseq	qPCR	Comparison	RNAseq	qPCR	Comparison	RNAseq	qPCR	Comparison	RNAseq	qPCR	Comparison	RNAseq	qPCR
FM_0vs2	-10.1286	-1.27916	C_1vs2	-9.43694	-1.29536	FM_0vs2	-10.7526	-0.149671	T2_FMvsFMR	9.49185	1.33902	T0_FMvsFMR	-13.1343	-1.38811	T1_CvsFM	-9.65245	-2.5824	T2_FMvsFMR	-9.08684	-3.8136
T2_CvFM	-9.99797	0.315574	FM_0vs2	-7.43405	-0.606322	T1_CvsFM	-4.13084	-3.57895				FM_0vs2	-10.3523	-6.30159
T2_FMvsFMR	9.92011	2.9				T2_FMvsFMR	10.4316	1.61893
						C_1vs2	-2.96234	-4.12121
	RNAseq	qPCR
	-10.1286	-1.27916
	-9.99797	0.315574
	9.92011	2.9
	-9.43694	-1.29536
	-7.43405	-0.606322
	-10.7526	-0.149671
	-4.13084	-3.57895
	10.4316	1.61893
	-2.96234	-4.12121
	9.49185	1.33902
	-13.1343	-1.38811
	-10.3523	-6.30159
	-9.65245	-2.5824
	-9.08684	-3.8136
